# Supplementary material
Source: PubMed Central journal article supplement (PMC3878932)
Supplement: 10.3163.1536-5050.102.1.006.sg001.pdf [file 10.3163.1536-5050.102.1.006.sg001.pdf]

## **Mobile devices in medicine: a survey of how medical students, residents, and faculty use smartphones and other mobile devices to find information**

**Jill T. Boruff, MLIS; Dale Storie, MLIS, MA**

### **APPENDIX**

#### **Mobile device use in medicine survey**

McGill University Life Sciences Library, University of Alberta John W. Scott Health Sciences Library, University of Calgary, and University of Ottawa are conducting a research survey in order to know how you are using your mobile device. There are fourteen questions, and it should take you ten to twelve minutes to respond.

It is your choice whether you wish to participate in this survey. Any question you prefer not to answer can be skipped, and you can terminate the survey at any time. At the end of the study, you will have the option to provide your contact information for a follow-up interview. If you choose to provide this information, we will separate your contact information from your responses before reading and analyzing these data. In this manner, your name will not continue to be associated with the data you provide and your confidentiality will be assured. We thank you for your time!

The results of this survey will be disseminated in a conference presentation and, potentially, an academic paper.

This survey has been reviewed for its adherence to ethical guidelines by all participating universities. If you have any questions or concerns regarding your rights or welfare as a participant in this research study, please contact the appropriate ethics officer:

McGill Ethics Officer at 514.398.6831 or [lynda.mcneil@mcgill.ca](mailto:lynda.mcneil@mcgill.ca)  
University of Alberta Ethics Officer at 780.492.0459 or [reoffice@ualberta.ca](mailto:reoffice@ualberta.ca)  
University of Calgary Ethics Officer at 403.220.7990 or [chreb@ucalgary.ca](mailto:chreb@ucalgary.ca)  
University of Ottawa Ethics Officer at 613.798.5555 x14902

By clicking on "Next," I agree to participate in this survey. I am aware that I am free to withdraw from the survey at any time up until I submit my responses to the survey.

This cross-Canada survey has been designed to learn more about whether you have a mobile device such as an iPhone, iPad, iPod Touch, Blackberry, Android, or other smartphone, and how you use this mobile device.

1. Do you have a mobile device (an iPhone, iPad, iPod Touch, Android phone, Blackberry, or any phone that can access the Internet)?

Please choose *only one* of the following:

- Yes
- No

## Part 1

2. What is your primary role? I am a

Only answer this question if the following conditions are met: ((3.NAOK=="Y"))

Please choose *only one* of the following:

- First- or second-year undergraduate medical student
- Third- or fourth-year undergraduate medical student
- Medical resident
- Graduate student (other than medical resident)
- Faculty member
- Clinical instructor
- Other \_\_\_\_\_

What is your medical or scientific specialty?

Only answer this question if the following conditions are met: ((1.NAOK=="A3" or 1.NAOK=="A4" or 1.NAOK=="A5" or 1.NAOK=="A6") and (3.NAOK=="Y"))

Please choose *only one* of the following:

- Anesthesiology
- Basic sciences (e.g., microbiology, anatomy)
- Diagnostic radiology
- Emergency medicine
- Family medicine
- Internal medicine
- Neurology
- Pediatrics
- Psychiatry
- Surgery
- Other \_\_\_\_\_

3. What is your institution?

Only answer this question if the following conditions are met: ((3.NAOK=="Y"))

Please choose *only one* of the following:

- McGill University
- University of Alberta
- University of Calgary
- University of Ottawa
- University of Manitoba

## Part 2

4. Which mobile device do you have?

Only answer this question if the following conditions are met: ((3.NAOK=="Y"))

Please choose *all* that apply:

- iPhone or iPod Touch
- iPad

- Other tablet computer
- Android phone
- Blackberry
- Other phone with Internet access

5. Have you used your mobile device for any of the following purposes?

Only answer this question if the following conditions are met: ((3.NAOK=="Y"))

Please choose *all* that apply:

- Take notes
- Find drug information
- Find practice guidelines
- Read point-of-care information from sources such as DynaMed or UpToDate
- Clinical calculations
- Differential diagnoses
- Search for journal articles
- Read journal articles
- None of these
- Other: \_\_\_\_\_

6. How often do you use your mobile device to access medical resources?

Only answer this question if the following conditions are met: ((3.NAOK=="Y"))

Please choose *only one* of the following:

- More than once a day
- Once a day
- Several times a week
- Several times a month
- Once a month
- Less than once a month
- Never

"Medical resources" means both downloaded applications as well as websites that you access through the web browser on your device.

### Part 3

7. Please describe the last time you used your mobile device to find medical information.

What resource(s) did you use?

Only answer this question if the following conditions are met: ((3.NAOK=="Y"))

Please write your answer here:

---

Did you find what you needed?

Only answer this question if the following conditions are met: ((3.NAOK=="Y"))

Please write your answer here:

---

How long did it take you?

Only answer this question if the following conditions are met: ((3.NAOK=="Y"))

Please write your answer here:

---

What worked well?

Only answer this question if the following conditions are met: ((3.NAOK=="Y"))

Please write your answer here:

---

What did not work well?

Only answer this question if the following conditions are met: ((3.NAOK=="Y"))

Please write your answer here:

---

#### Part 4

8. How many medical resources have you purchased to be used on your mobile device?

Only answer this question if the following conditions are met: ((3.NAOK=="Y"))

Please choose *only one* of the following:

- Zero
- One to four
- Five to ten
- More than ten

"Medical resources" means both downloaded applications as well as websites that you access on the web browser on your mobile device.

9. Are you aware that your library provides access to medical resources for your mobile device?

Only answer this question if the following conditions are met: ((3.NAOK=="Y"))

Please choose *only one* of the following:

- Yes
- No

"Medical resources" means both downloaded applications as well as websites that you access on the web browser on your mobile device.

Have you used any of those resources?

Only answer this question if the following conditions are met: ((3.NAOK=="Y") and (9.NAOK=="Y"))

Please choose *only one* of the following:

- Yes
- No

Have you found these resources to be useful?

Only answer this question if the following conditions are met: ((3.NAOK=="Y") and (9.NAOK=="Y") and (9.1.NAOK=="Y"))

Please choose *only one* of the following:

- Yes
- No

Why or why not?

Only answer this question if the following conditions are met: ((3.NAOK=="Y") and (9.NAOK=="Y") and (9.1.NAOK=="Y") and (9.2.NAOK=="N" or 9.2.NAOK=="Y"))

Please write your answer here:

---

10. Please list up to five medical resources that you use most frequently on your mobile device.

Only answer this question if the following conditions are met: ((3.NAOK == "Y"))

Please write your answer(s) here:

- #1 \_\_\_\_\_
- #2 \_\_\_\_\_
- #3 \_\_\_\_\_
- #4 \_\_\_\_\_
- #5 \_\_\_\_\_

For your favourite resource, why do you use it most often?

Only answer this question if the following conditions are met: ((3.NAOK=="Y"))

Please write your answer here:

---

## Part 5

11. What are the barriers you have encountered when accessing medical resources on your mobile device?

Only answer this question if the following conditions are met: ((3.NAOK=="Y"))

Please choose *all* that apply:

- Wireless access in the hospital or clinic
- Knowing what resources are available
- Understanding how to use the resources
- Technology problems
- Complicated installation process
- Do not have permission to install software (e.g., corporate Blackberry)
- Lack of time
- Other: \_\_\_\_\_

"Medical resources" means both downloaded applications as well as websites that you access on the web browser on your mobile device.

12. Where do you get support for your mobile device?

Only answer this question if the following conditions are met: ((3.NAOK=="Y"))

Please choose *all* that apply:

- Friends
- Colleagues
- Cell phone provider/carrier
- University IT
- Hospital IT
- Library
- Other: \_\_\_\_\_

13. What support would you like the library to provide? Check all that apply.

Only answer this question if the following conditions are met: ((3.NAOK=="Y"))

Please choose *all* that apply:

- Hands-on workshops on how to use mobile devices
- Hands-on workshops on how to use medical resources on mobile devices
- Drop-in troubleshooting assistance
- Online how-to guides specific to your institution
- More resources
- None
- Other: \_\_\_\_\_

What medical resources would you like the library to provide for your mobile device?

Only answer this question if the following conditions are met: ((3.NAOK=="Y") and  
(13\_SQ005.NAOK=="Y"))

Please write your answer here:

---

## Part 6

14. If you are interested in being contacted for a follow-up interview, please leave your email address. Your email address will not be connected with your responses.

Only answer this question if the following conditions are met: ((3.NAOK=="Y"))

Please write your answer here:

---

## Part 7

Please press the "submit" button below to submit your responses.

Thank you for your participation!

Submit your survey. Thank you for completing this survey.
