# Supplementary material
Source: PubMed Central journal article supplement (PMC3878932)
Supplement: 10.3163.1536-5050.102.1.006.sg002.pdf [file 10.3163.1536-5050.102.1.006.sg002.pdf]

**Mobile devices in medicine: a survey of how medical students, residents, and faculty use smartphones and other mobile devices to find information**

Jill T. Boruff, MLIS; Dale Storie, MLIS, MA

**Table 1**  
Device ownership by user group (n=1,071)

| What mobile device do you own?   | 1st- or 2nd-year undergraduate medical student |         | 3rd- or 4th-year undergraduate medical student |         | Medical resident |         | Graduate student (other than medical resident) |         | Faculty member |         | Other |         | Total |         |
|----------------------------------|------------------------------------------------|---------|------------------------------------------------|---------|------------------|---------|------------------------------------------------|---------|----------------|---------|-------|---------|-------|---------|
| iPhone or iPod Touch             | 124                                            | (75.6%) | 70                                             | (75.3%) | 250              | (79.9%) | 46                                             | (51.7%) | 256            | (67.0%) | 23    | (76.7%) | 769   | (71.8%) |
| Android phone                    | 23                                             | (14.0%) | 16                                             | (17.2%) | 32               | (10.2%) | 21                                             | (23.6%) | 23             | (6.0%)  | 2     | (6.7%)  | 117   | (10.9%) |
| Blackberry                       | 21                                             | (12.8%) | 9                                              | (9.7%)  | 18               | (5.8%)  | 18                                             | (20.2%) | 85             | (22.3%) | 6     | (20.0%) | 157   | (14.7%) |
| Other phone with Internet access | 3                                              | (1.8%)  | 3                                              | (3.2%)  | 6                | (1.9%)  | 8                                              | (9.0%)  | 9              | (2.4%)  | 1     | (3.3%)  | 30    | (2.8%)  |
| iPad                             | 31                                             | (18.9%) | 18                                             | (19.4%) | 165              | (52.7%) | 13                                             | (14.6%) | 213            | (55.8%) | 11    | (36.7%) | 451   | (42.1%) |
| Other tablet computer            | 4                                              | (2.4%)  | 2                                              | (2.2%)  | 14               | (4.5%)  | 3                                              | (3.4%)  | 20             | (5.2%)  | 2     | (6.7%)  | 45    | (4.2%)  |
| Both a smartphone and a tablet   | 34                                             | (20.7%) | 19                                             | (20.4%) | 164              | (52.4%) | 14                                             | (15.7%) | 204            | (53.4%) | 13    | (43.3%) | 448   | (41.8%) |

Participants could select more than 1 option, so totals do not add up to 100%.
