# Supplementary material
Source: PubMed Central journal article supplement (PMC3878932)
Supplement: 10.3163.1536-5050.102.1.006.sg003.pdf [file 10.3163.1536-5050.102.1.006.sg003.pdf]

**Mobile devices in medicine: a survey of how medical students, residents, and faculty use smartphones and other mobile devices to find information**

Jill T. Boruff, MLIS; Dale Storie, MLIS, MA

**Table 2**  
 Device use by user group (n=1,067)

| Have you used your mobile device for any of the following purposes?     | 1st- or 2nd-year undergraduate medical student |         | 3rd- or 4th-year undergraduate medical student |         | Medical resident |         | Graduate student (other than medical resident) |         | Faculty member |         | Other |         | Total |         |
|-------------------------------------------------------------------------|------------------------------------------------|---------|------------------------------------------------|---------|------------------|---------|------------------------------------------------|---------|----------------|---------|-------|---------|-------|---------|
| Take notes                                                              | 54                                             | (33.1%) | 44                                             | (47.3%) | 194              | (62.0%) | 42                                             | (47.7%) | 201            | (52.9%) | 16    | (53.3%) | 551   | (51.6%) |
| Find drug information                                                   | 126                                            | (77.3%) | 90                                             | (96.8%) | 289              | (92.3%) | 26                                             | (29.5%) | 235            | (61.8%) | 18    | (60.0%) | 784   | (73.5%) |
| Find practice guidelines                                                | 67                                             | (41.1%) | 56                                             | (60.2%) | 231              | (73.8%) | 17                                             | (19.3%) | 147            | (38.7%) | 13    | (43.3%) | 531   | (49.8%) |
| Read point-of-care information from sources such as DynaMed or UpToDate | 81                                             | (49.7%) | 66                                             | (71.0%) | 229              | (73.2%) | 9                                              | (10.2%) | 130            | (34.2%) | 7     | (23.3%) | 522   | (48.9%) |
| Clinical calculations                                                   | 60                                             | (36.8%) | 81                                             | (87.1%) | 268              | (85.6%) | 12                                             | (13.6%) | 184            | (48.4%) | 13    | (43.3%) | 618   | (57.9%) |
| Differential diagnoses                                                  | 65                                             | (39.9%) | 57                                             | (61.3%) | 173              | (55.3%) | 7                                              | (8.0%)  | 64             | (16.8%) | 3     | (10.0%) | 369   | (34.6%) |
| Search for journal articles                                             | 46                                             | (28.2%) | 26                                             | (28.0%) | 165              | (52.7%) | 44                                             | (50.0%) | 200            | (52.6%) | 15    | (50.0%) | 496   | (46.5%) |
| Read journal articles                                                   | 47                                             | (28.8%) | 26                                             | (28.0%) | 196              | (62.6%) | 42                                             | (47.7%) | 213            | (56.1%) | 12    | (40.0%) | 536   | (50.2%) |
| None of these                                                           | 21                                             | (12.9%) | 3                                              | (3.2%)  | 6                | (1.9%)  | 21                                             | (23.9%) | 53             | (13.9%) | 4     | (13.3%) | 108   | (10.1%) |
| Other use                                                               | 13                                             | (8.0%)  | 3                                              | (3.2%)  | 32               | (10.2%) | 3                                              | (3.4%)  | 60             | (15.8%) | 5     | (16.7%) | 116   | (10.9%) |

Participants could select more than 1 option, so totals do not add up to 100%.
